# Supplementary material for: Fungal Screening for Potential PET Depolymerization
Source: MDPI journal article supplement (doi:10.3390/polym15061581), 2023-03-22
Supplement: s1 [file s1]

## Supplementary material

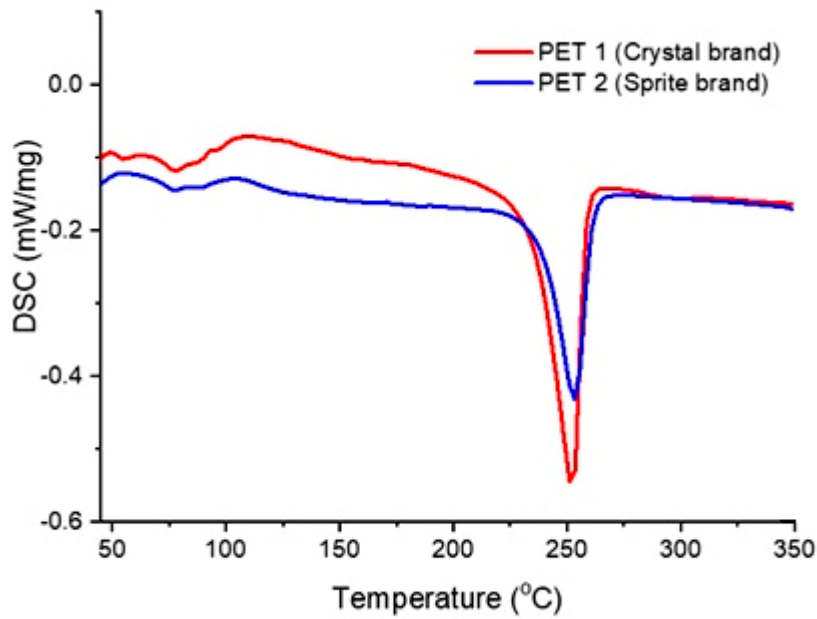

**Figure S1.** The thermograms for PET1 (Crystal brand) and PET2 (Sprite brand) fragments, with melting temperatures of 251.12 °C for PET1 and 253.41 °C for PET2.

$$X_c = \frac{\Delta H_m}{\Delta H_{mc}} \times 100 \quad X_c = \frac{\Delta H_m}{\Delta H_{mc}} \times 100 \quad X_c = \frac{\Delta H_m}{\Delta H_{mc}} \times 100 \quad (S1)$$

**Equation S1.** Percentage calculation of the crystallinity of the samples, where  $\Delta H_m$  is the sample melting enthalpy and  $\Delta H_{mc}$  is the melting heat of crystalline PET.

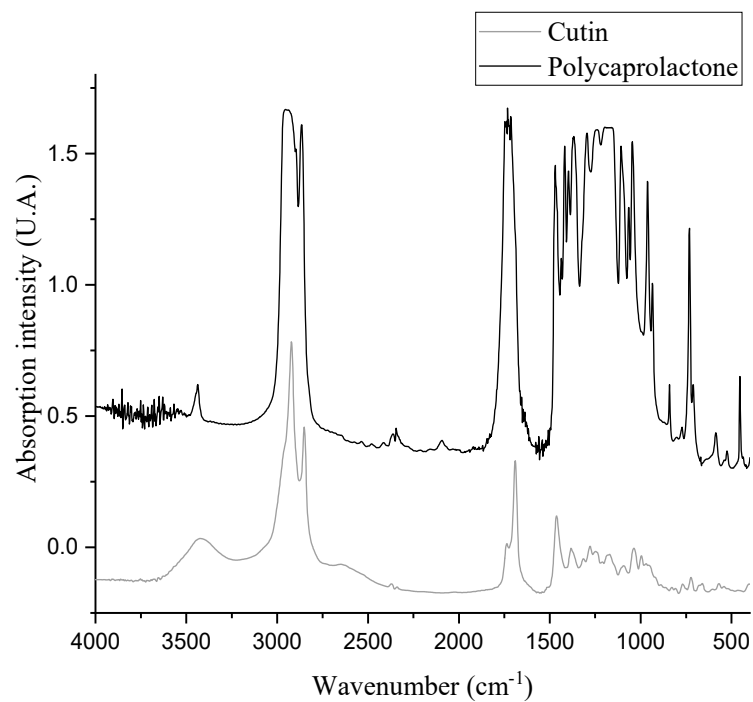

**Figure S2.** Infrared absorption spectra for Polycaprolactone (in dichloromethane) and powdered cutin extracted from *Fuji* apple peels. The samples were prepared in KBr tablets.

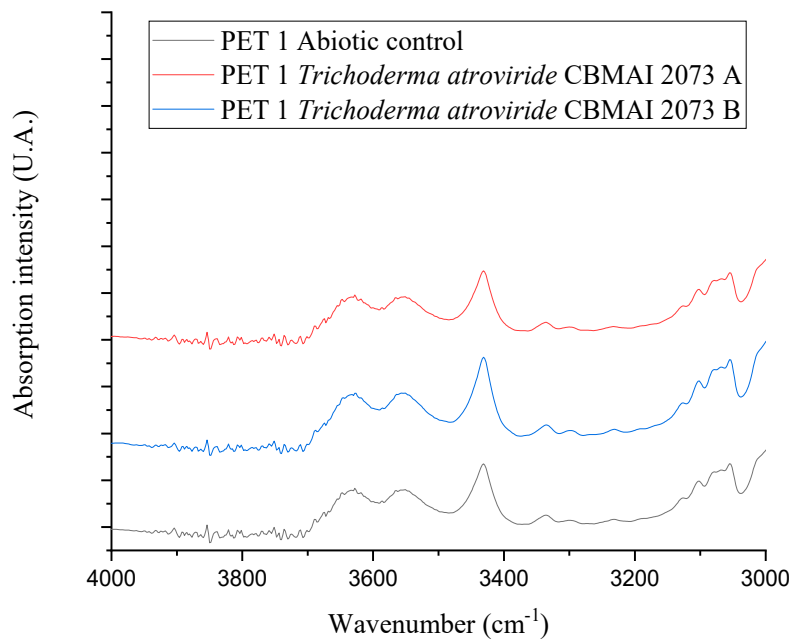

**Figure S3. A.** FTIR spectra of the 4000  $\text{cm}^{-1}$  to 3000  $\text{cm}^{-1}$  region of the treatment with the isolate *Trichoderma* sp CBMAI 2073 in PET1.

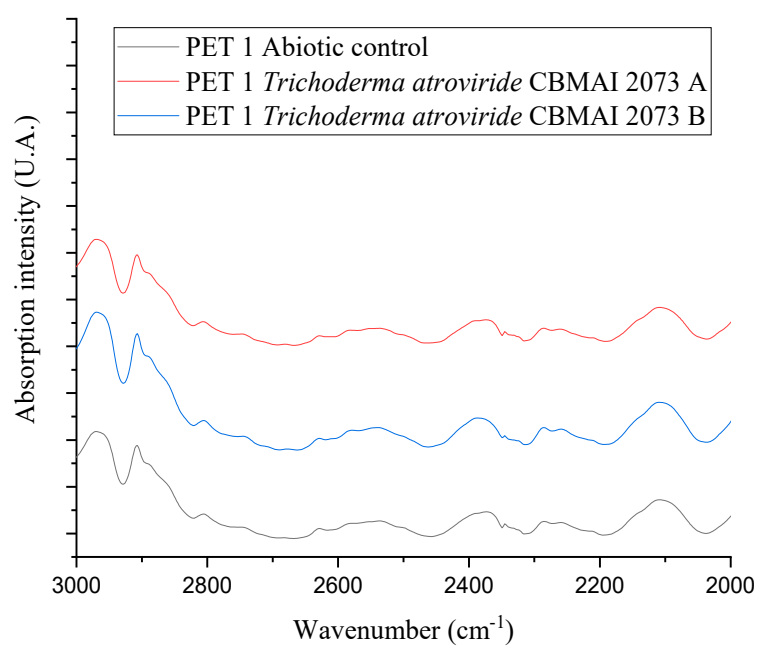

**Figure S3. B.** FTIR spectra of the 3000  $\text{cm}^{-1}$  to 2000  $\text{cm}^{-1}$  region of the treatment with the isolate *Trichoderma* sp CBMAI 2073 in PET1.

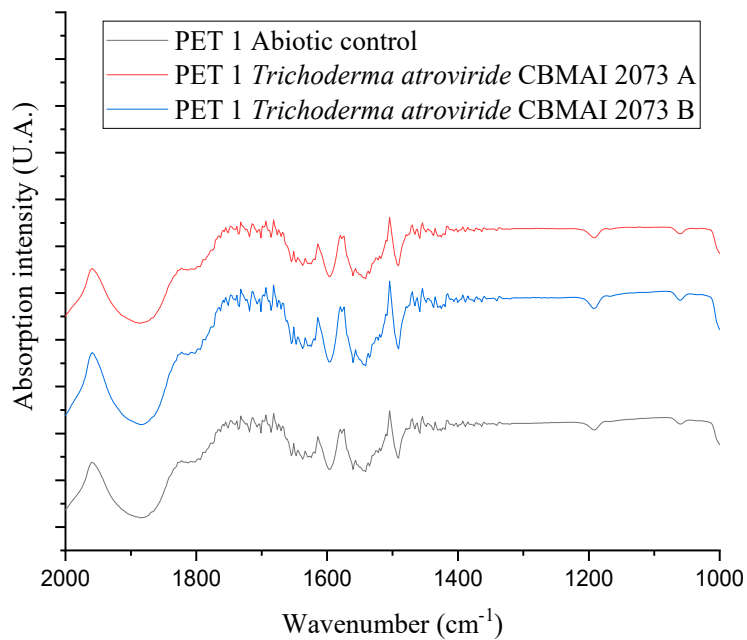

**Figure S3. C.** FTIR spectra of the 2000  $\text{cm}^{-1}$  to 1000  $\text{cm}^{-1}$  region of the treatment with the isolate *Trichoderma* sp CBMAI 2073 in PET1.

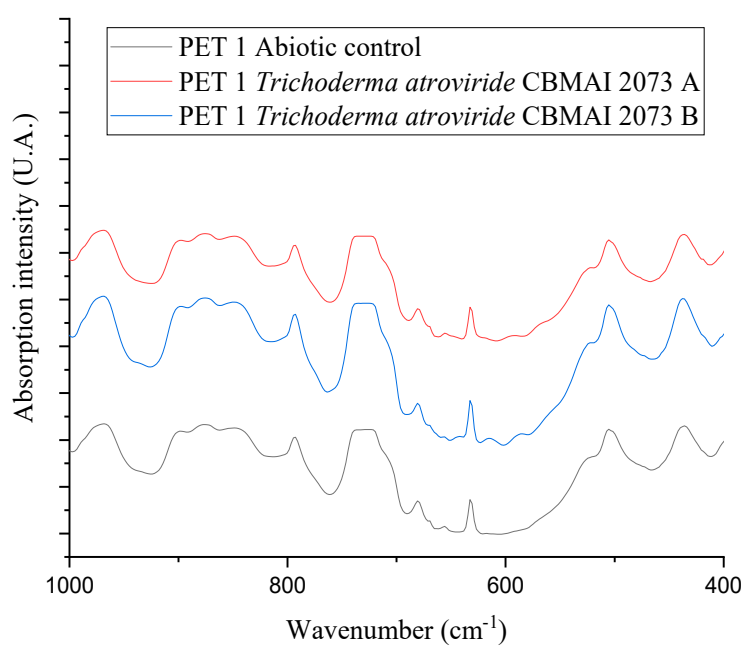

**Figure S3. D.** FTIR spectra of the 1000 cm<sup>-1</sup> to 400 cm<sup>-1</sup> region of the treatment with the isolate *Trichoderma* sp CBMAI 2073 in PET1.

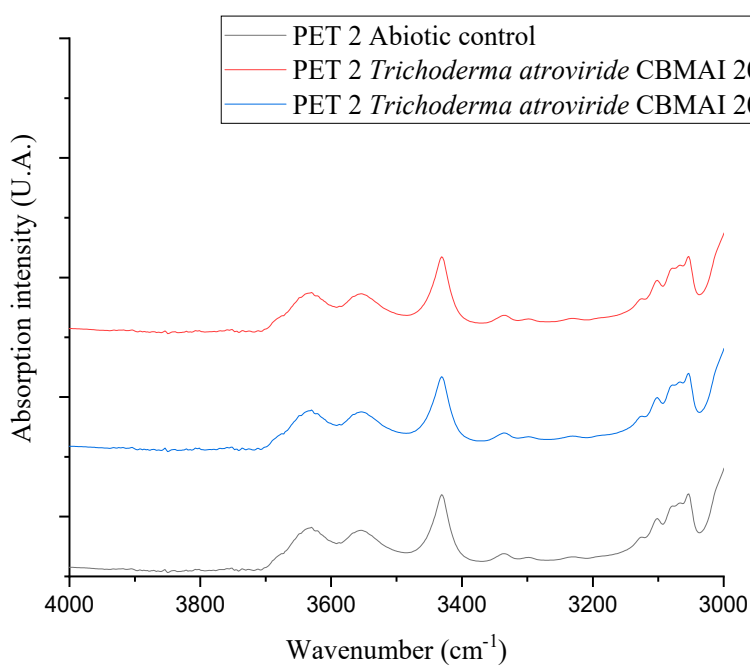

**Figure S3. E.** FTIR spectra of the 4000 cm<sup>-1</sup> to 3000 cm<sup>-1</sup> region of the treatment with the isolate *Trichoderma* sp CBMAI 2073 in PET2.

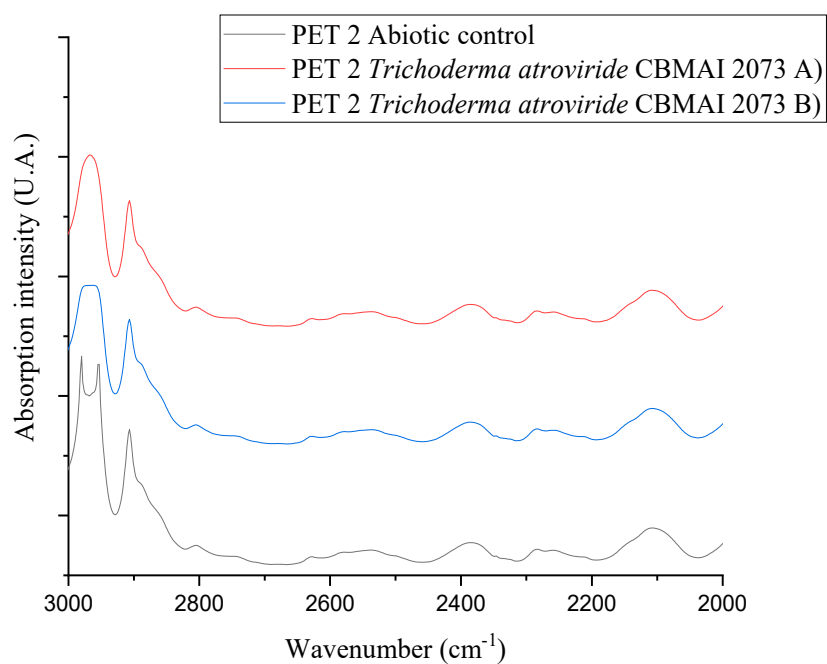

**Figure S3. F.** FTIR spectra of the 3000  $\text{cm}^{-1}$  to 2000  $\text{cm}^{-1}$  region of the treatment with the isolate *Trichoderma* sp CBMAI 2073 in PET2.

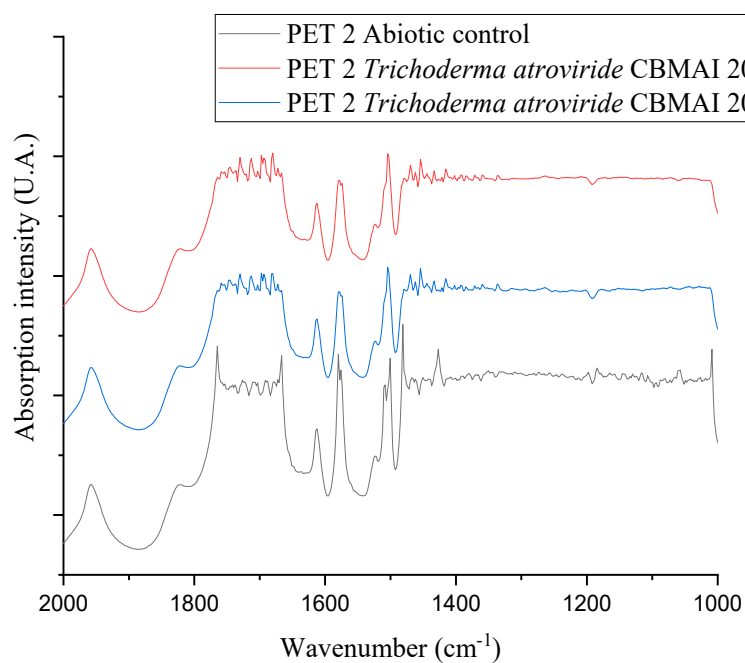

**Figure S3. G.** FTIR spectra of the 2000  $\text{cm}^{-1}$  to 1000  $\text{cm}^{-1}$  region of the treatment with the isolate *Trichoderma* sp CBMAI 2073 in PET2.

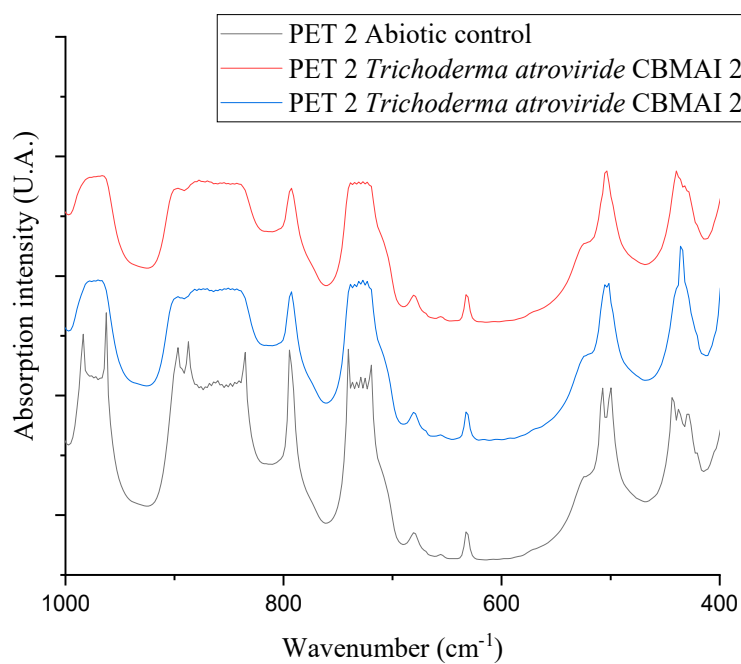

**Figure S3. H.** FTIR spectra of the 1000  $\text{cm}^{-1}$  to 400  $\text{cm}^{-1}$  region of the treatment with the isolate *Trichoderma* sp CBMAI 2073 in PET2.

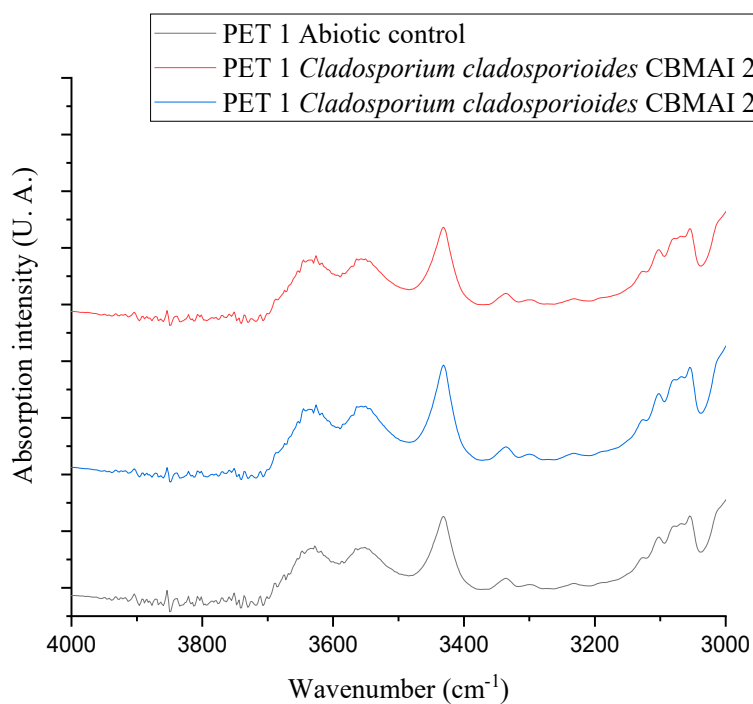

**Figure S3. I.** FTIR spectra of the 4000  $\text{cm}^{-1}$  to 3000  $\text{cm}^{-1}$  region of the treatment with the isolate *Cladosporium cladosporioides* CBMAI 2075 in PET1.

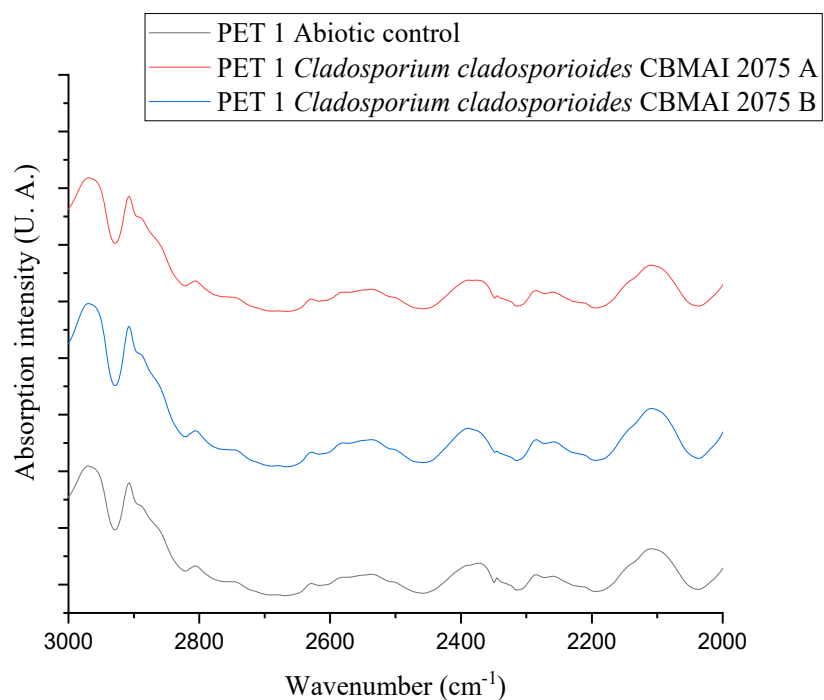

**Figure S3. J.** FTIR spectra of the 3000  $\text{cm}^{-1}$  to 2000  $\text{cm}^{-1}$  region of the treatment with the isolate *Cladosporium cladosporioides* CBMAI 2075 in PET1.

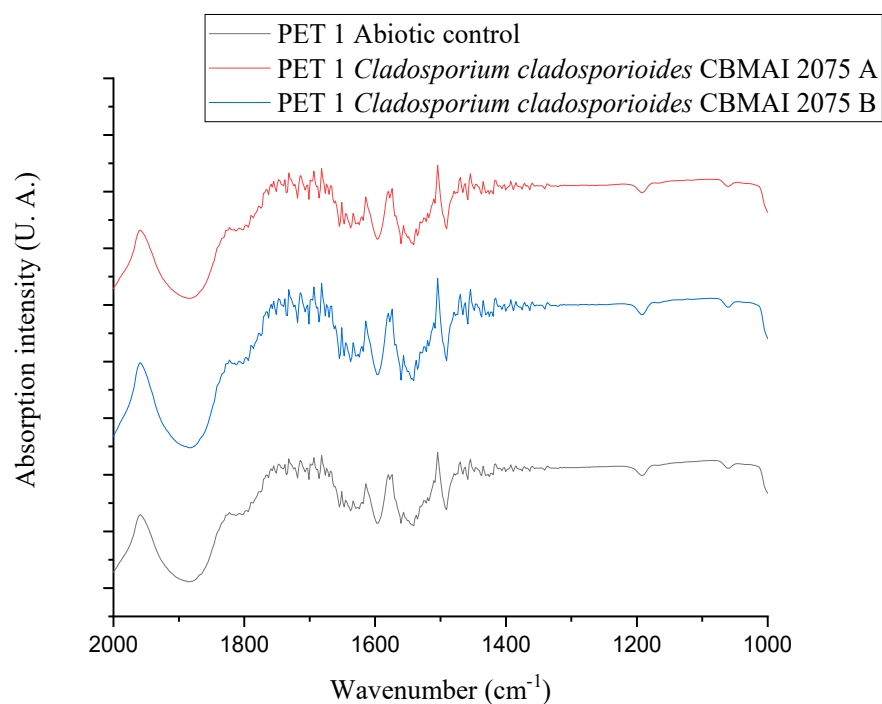

**Figure S3. K.** FTIR spectra of the 2000  $\text{cm}^{-1}$  to 1000  $\text{cm}^{-1}$  region of the treatment with the isolate *Cladosporium cladosporioides* CBMAI 2075 in PET1.

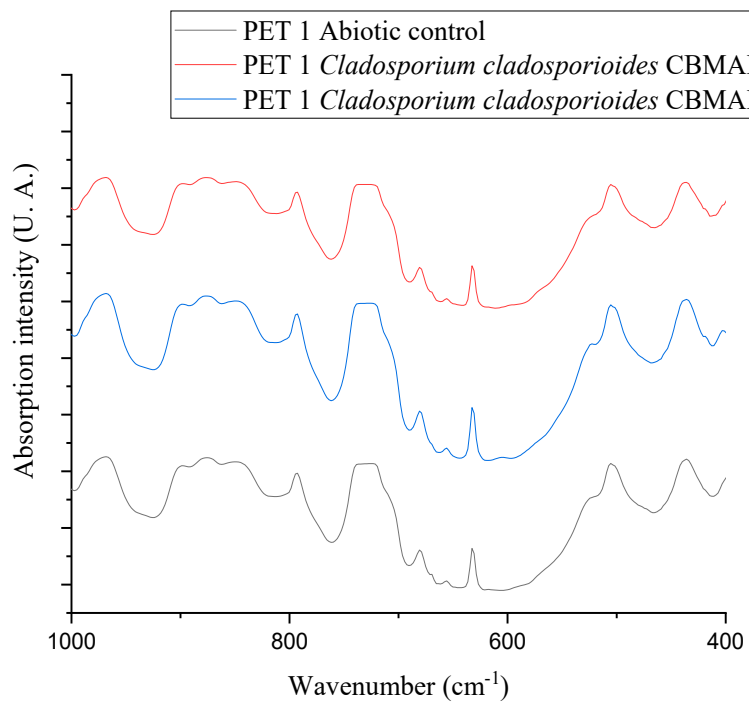

**Figure S3. L.** FTIR spectra of the 1000  $\text{cm}^{-1}$  to 400  $\text{cm}^{-1}$  region of the treatment with the isolate *Cladosporium cladosporioides* CBMAI 2075 in PET1.

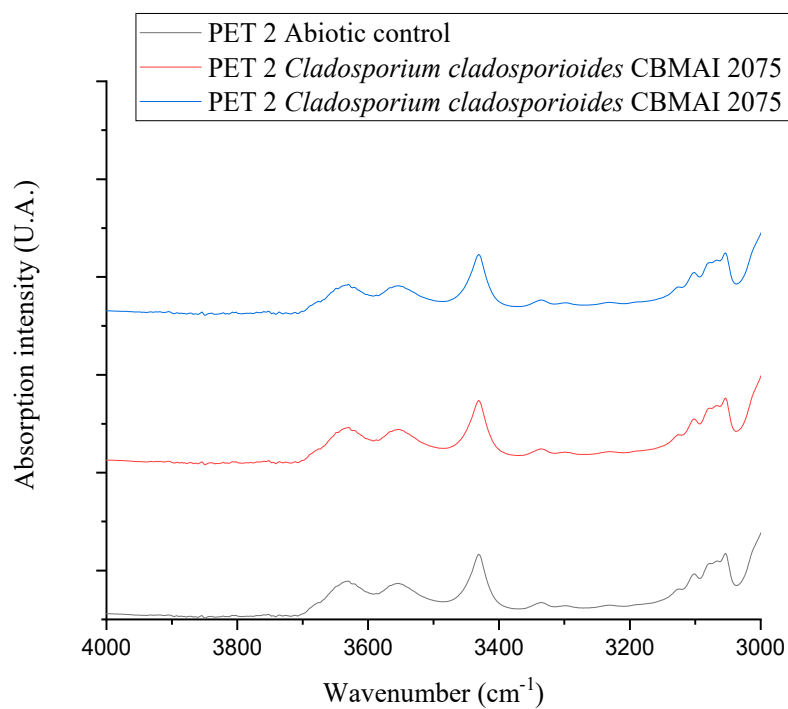

**Figure S3. M.** FTIR spectra of the 4000  $\text{cm}^{-1}$  to 3000  $\text{cm}^{-1}$  region of the treatment with the isolate *Cladosporium cladosporioides* CBMAI 2075 in PET2.



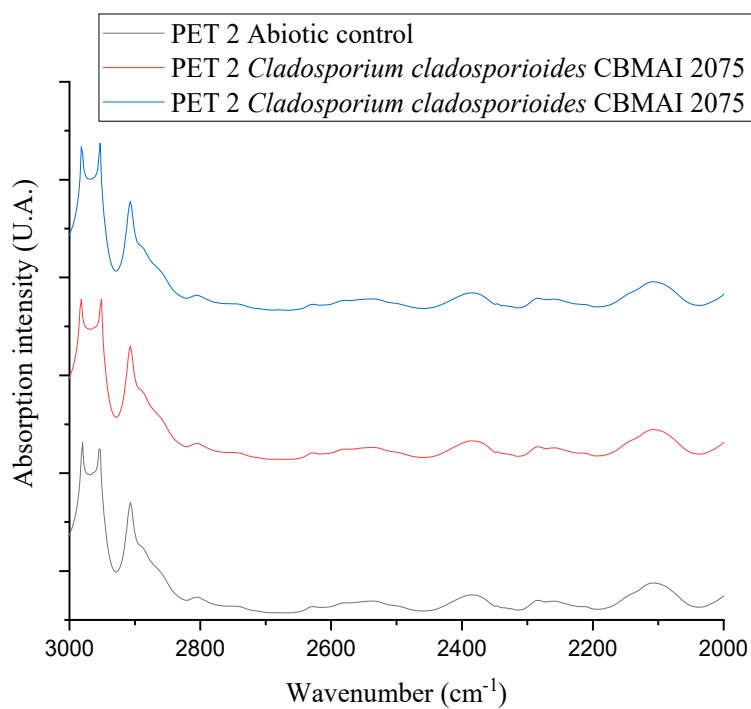

**Figure S3. N.** FTIR spectra of the 3000  $\text{cm}^{-1}$  to 2000  $\text{cm}^{-1}$  region of the treatment with the isolate *Cladosporium cladosporioides* CBMAI 2075 in PET2.

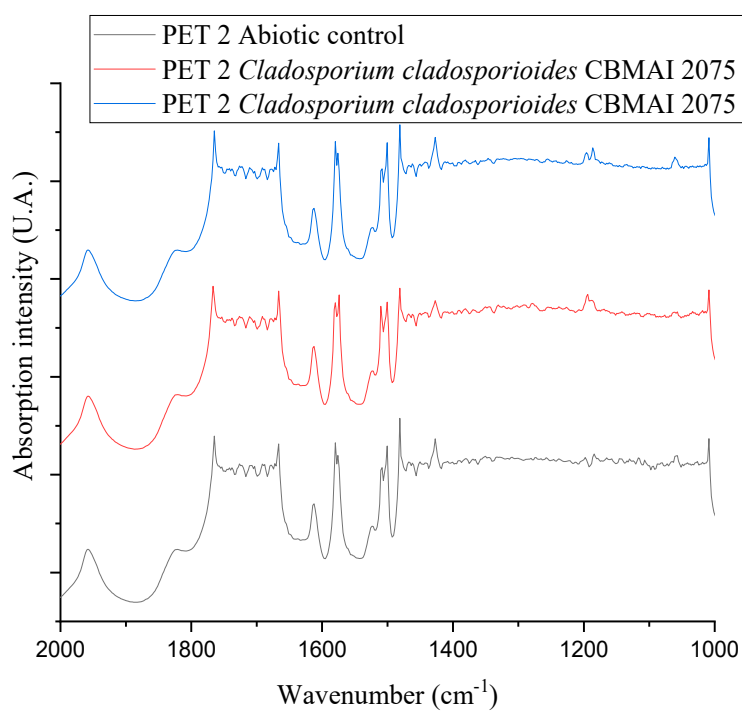

**Figure S3. O.** FTIR spectra of the 2000  $\text{cm}^{-1}$  to 1000  $\text{cm}^{-1}$  region of the treatment with the isolate *Cladosporium cladosporioides* CBMAI 2075 in PET2.

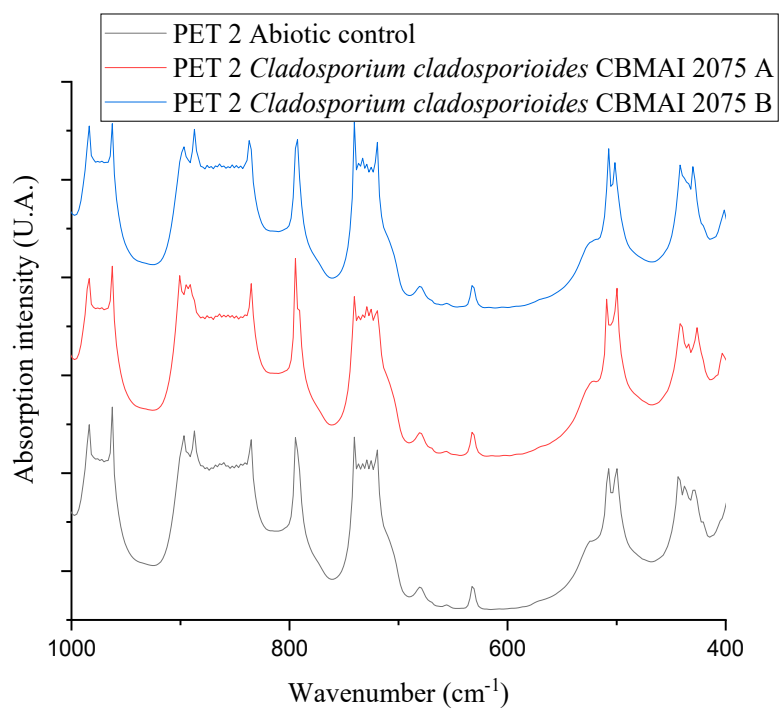

**Figure S3. P.** FTIR spectra of the 1000  $\text{cm}^{-1}$  to 400  $\text{cm}^{-1}$  region of the treatment with the isolate *Cladosporium cladosporioides* CBMAI 2075 in PET2.

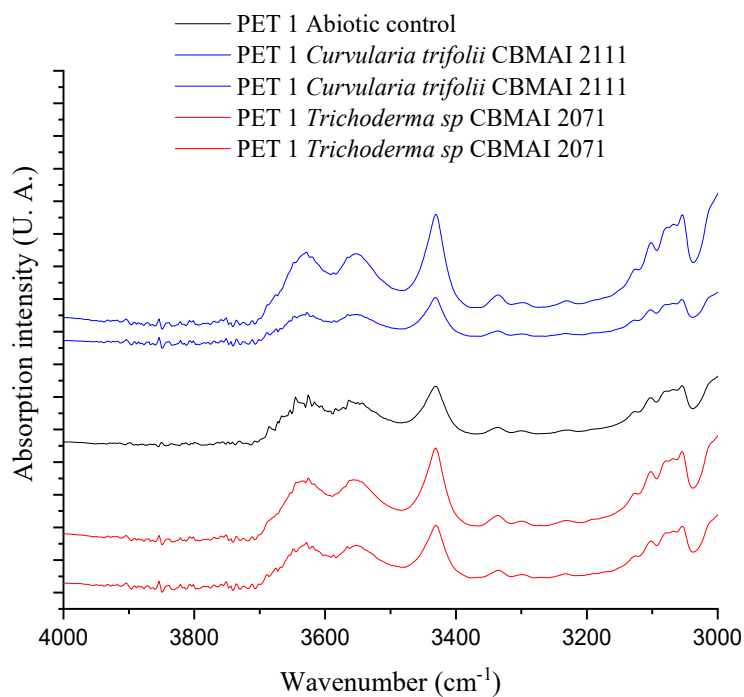

**Figure S4. A.** FTIR spectra of the 4000  $\text{cm}^{-1}$  to 3000  $\text{cm}^{-1}$  region of the treatment with the isolates *Curvularia trifolii* CBMAI 2111 and *Trichoderma atroviride* CBMAI 2071 in PET1.

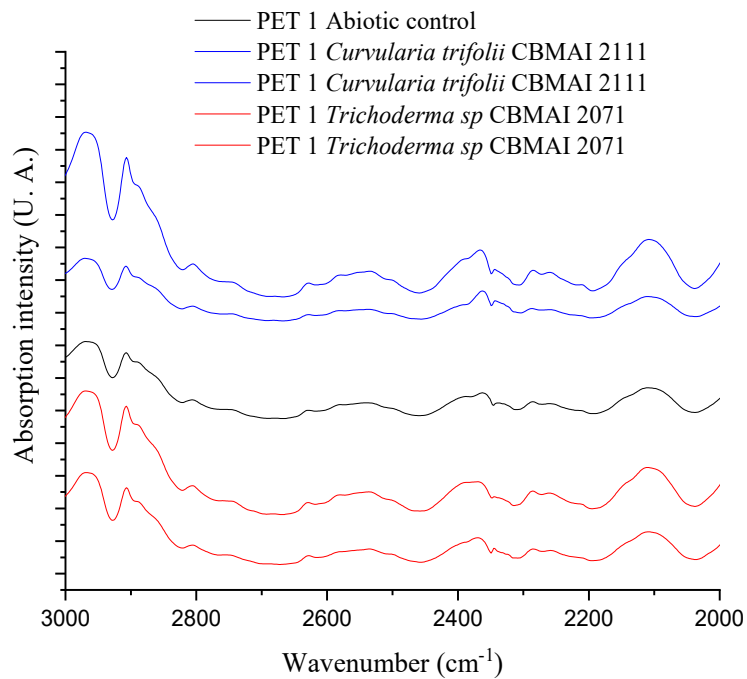

**Figure S4. B.** FTIR spectra of the 3000  $\text{cm}^{-1}$  to 2000  $\text{cm}^{-1}$  region of the treatment with the isolates *Curvularia trifolii* CBMAI 2111 and *Trichoderma atroviride* CBMAI 2071 in PET1.

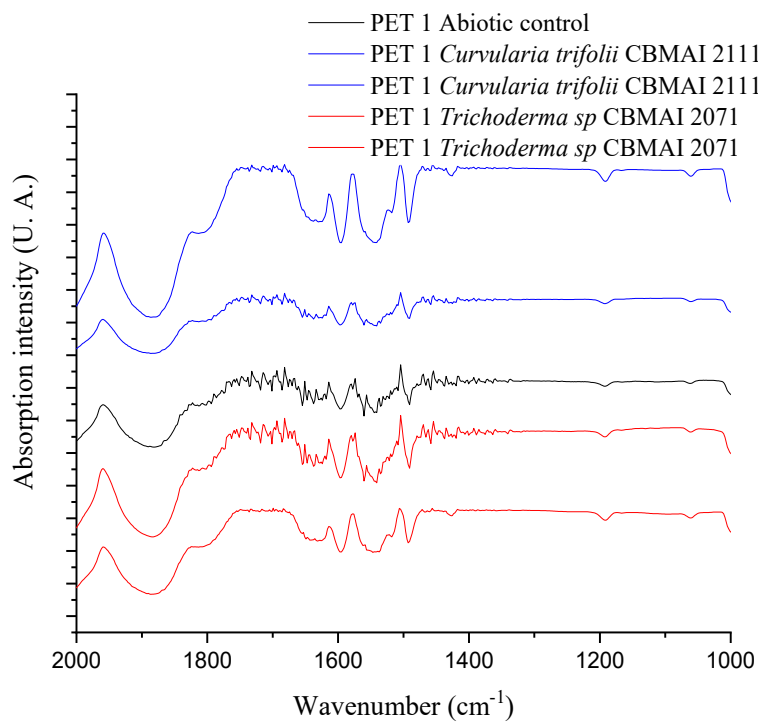

**Figure S4. C.** FTIR spectra of the 2000  $\text{cm}^{-1}$  to 1000  $\text{cm}^{-1}$  region of the treatment with the isolates *Curvularia trifolii* CBMAI 2111 and *Trichoderma atroviride* CBMAI 2071 in PET1.

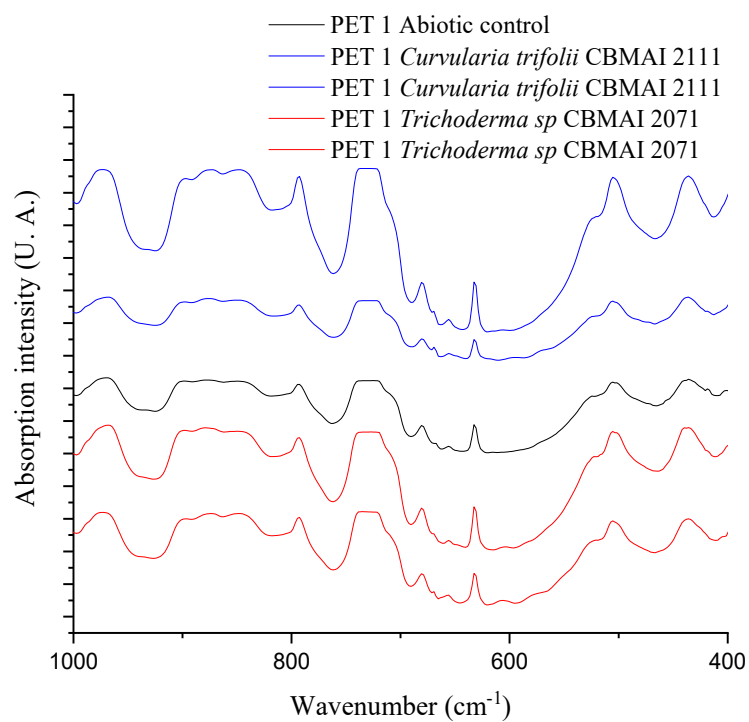

**Figure S4. D.** FTIR spectra of the 1000  $\text{cm}^{-1}$  to 400  $\text{cm}^{-1}$  region of the treatment with the isolates *Curvularia trifolii* CBMAI 2111 and *Trichoderma atroviride* CBMAI 2071 in PET1.

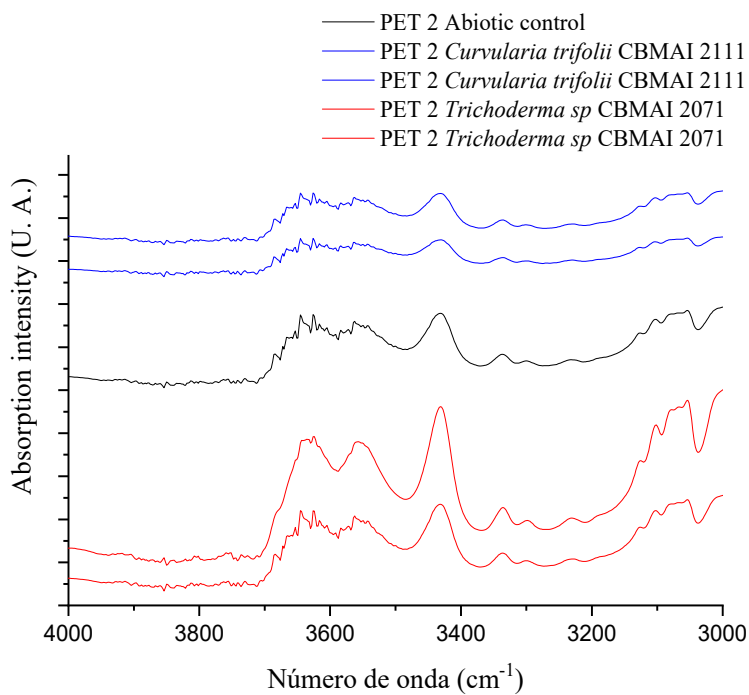

**Figure S4. E.** FTIR spectra of the 4000  $\text{cm}^{-1}$  to 3000  $\text{cm}^{-1}$  region of the treatment with the isolates *Curvularia trifolii* CBMAI 2111 and *Trichoderma atroviride* CBMAI 2071 in PET2.

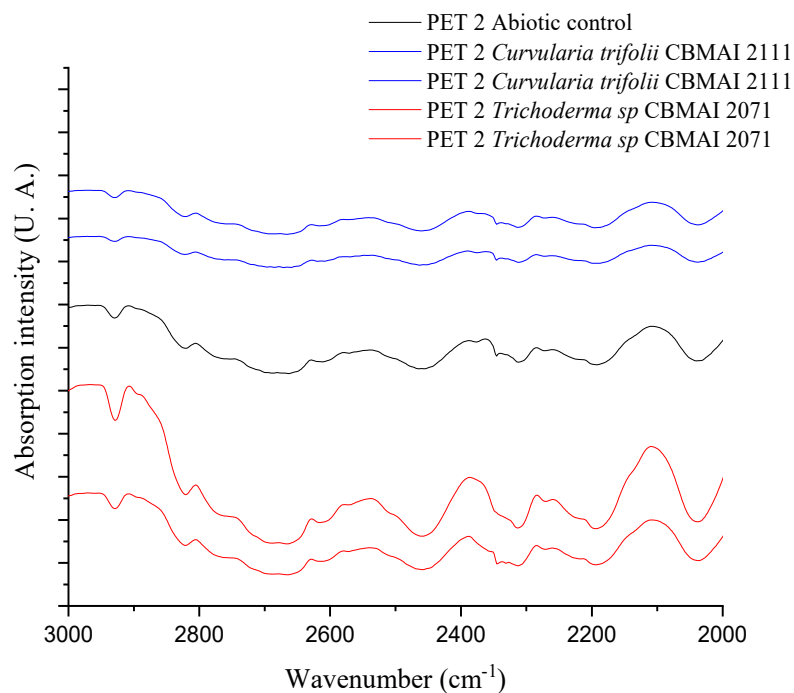

**Figure S4. F.** FTIR spectra of the 3000  $\text{cm}^{-1}$  to 2000  $\text{cm}^{-1}$  region of the treatment with the isolates *Curvularia trifolii* CBMAI 2111 and *Trichoderma atroviride* CBMAI 2071 in PET2.

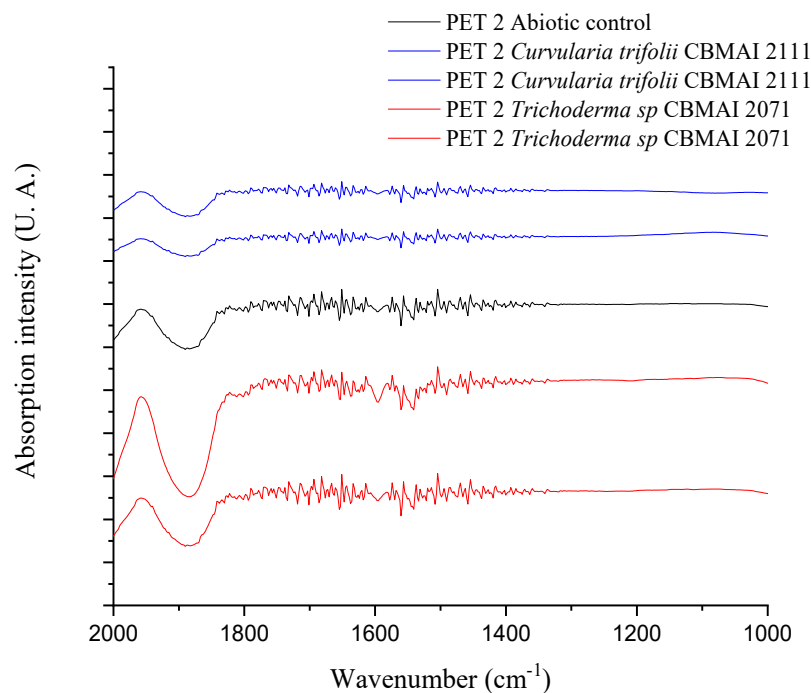

**Figure S4. G.** FTIR spectra of the 2000  $\text{cm}^{-1}$  to 1000  $\text{cm}^{-1}$  region of the treatment with the isolates *Curvularia trifolii* CBMAI 2111 and *Trichoderma atroviride* CBMAI 2071 in PET2.

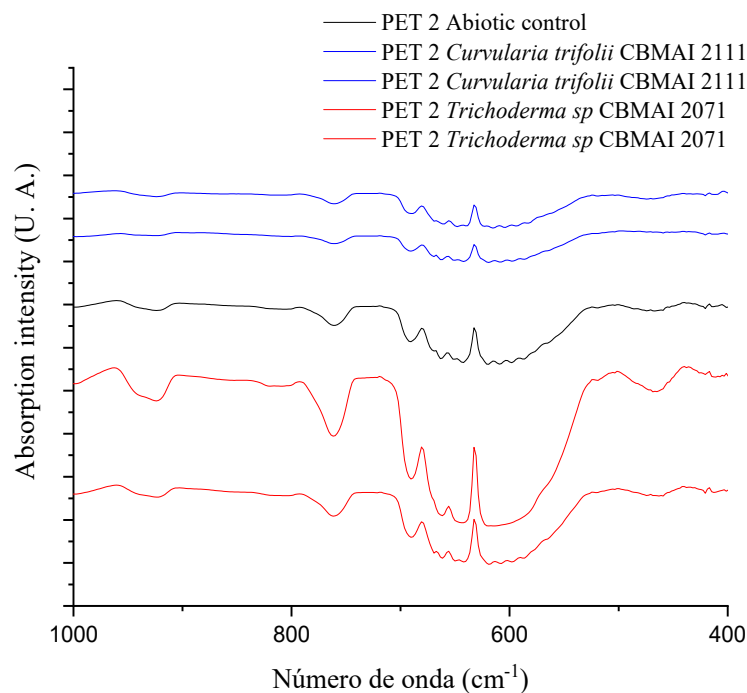

**Figure S4. H.** FTIR spectra of the 1000 cm<sup>-1</sup> to 400 cm<sup>-1</sup> region of the treatment with the isolates *Curvularia trifolii* CBMAI 2111 and *Trichoderma atroviride* CBMAI 2071 in PET2.

**Table S1.** Gradient programming applied to the chromatographic separations.

| Time (minutes) | Mobile phase B (%) |
|----------------|--------------------|
| 0.01           | 80                 |
| 5.0            | 40                 |
| 13.0           | 50                 |
| 16.0           | 0                  |
| 24.0           | 0                  |
| 25.0           | 80                 |
| 30.0           | 80                 |
| 35.0           | 80                 |
| 40.0           | 80                 |

**Table S2.** PET nanoparticle conversion (%) results after fifteen days of analysis.

| Code       | Identification                                                      | NPPET conversion (%)* |
|------------|---------------------------------------------------------------------|-----------------------|
| CBMAI 2111 | <i>Curvularia trifolii</i>                                          | 9.0±1.1               |
| CBMAI 2073 | <i>Trichoderma atroviride</i>                                       | 6.1±0.2               |
| CBMAI 2071 | <i>Trichoderma sp.</i>                                              | 3.6±0.8               |
| CBMAI 2111 | <i>Microsphaeropsis arundinis</i>                                   | 2.7±0.9               |
| CBMAI 2109 | <i>Microsphaeropsis arundinis</i>                                   | 2.0±0.4               |
| LMA 1269   | <i>Fusarium sp.</i>                                                 | 1.9±0.5               |
| CBMAI 2159 | <i>Pseudallescheria sp.</i> (Pseudallescheria/Scedosporium complex) | 1.9±1.0               |
| CBMAI 2083 | <i>Paecilomyces sp.</i>                                             | 1.7±0.7               |
| CBMAI 2189 | <i>Aspergillus fumigatus</i>                                        | 0.8±0.6               |
| CBMAI 2075 | <i>Cladosporium cladosporioides</i>                                 | 0.8±0.6               |
| LMA1251    | <i>Trichoderma sp.</i>                                              | 0.7±0.4               |
| CBMAI 2158 | <i>Paraconiothyrium cyclothyrioides</i>                             | 0.7±0.1               |
| CBMAI 2191 | <i>Penicillium koreense</i>                                         | 0.7±0.1               |
| CBMAI 2203 | <i>Paraconiothyrium cyclothyrioides</i>                             | 0.6±0.3               |
| LMA 216    | <i>Phoma herbarum</i>                                               | 0.6±0.6               |
| LMA 28     | <i>Aspergillus fumigatus</i>                                        | 0.5±0.0               |
| LMA 1825   | <i>Fusarium sp.</i>                                                 | 0.4±0.0               |

|            |                                         |         |
|------------|-----------------------------------------|---------|
| LMA 1172   | <i>Fusarium</i> sp.                     | 0.4±0.0 |
| CBMAI 2190 | <i>Aspergillus fumigatus</i>            | 0.4±0.2 |
| CBMAI 2186 | <i>Talaromyces veerkampii</i>           | 0.3±0.2 |
| CBMAI 2187 | <i>Paraconiothyrium cyclothyrioides</i> | 0.3±0.3 |
| CBMAI 2149 | <i>Trichoderma capillare</i>            | 0.3±0.0 |
| CBMAI 2155 | <i>Microsphaeropsis arundinis</i>       | 0.3±0.2 |
| LMA 167    | <i>Penicillium</i> sp.                  | 0.3±0.1 |
| LMA 11     | <i>Paecilomyces-like</i>                | 0.2±0.0 |
| LMA 1145   | <i>Fusarium</i> sp.                     | 0.1±0.0 |

\*conversion results from NPPET into HOTP expressed as mean percentage ± standard deviation (n = 3)

**Table S3.** Lipase and esterase activities determined by HTS with esterified fluorescent probes (results expressed as mean ± standard deviation, n = 4, analysis time of 96 h).

| Strain                               | Conversion %<br>(2-carbon probe) | Conversion %<br>(8-carbon probe) |
|--------------------------------------|----------------------------------|----------------------------------|
| <i>C. trifolii</i> CBMAI 2111        | 11.9±0.1                         | 10.8±2.1                         |
| <i>T. atroviride</i> CBMAI 2073      | 37.2±4.9                         | 46.0±3.4                         |
| <i>Trichoderma</i> sp. CBMAI 2071    | 0.0±0.0                          | 0.0±0.0                          |
| <i>C. cladosporioides</i> CBMAI 2075 | 41.66±0.8                        | 41.2±0.9                         |
